# Supplementary material for: Record of Early to Middle Eocene paleoenvironmental changes from lignite mines, western India
Source: Copernicus journal article supplement (doi:10.5194/jm-38-1-2019), 2019-01-18

Detailed logs with sample positions of all the four lignite mine sections A) Giral mine section, Barmer Basin B) Surkha mine section, Cambay Basin C) Matanomadh mine section, Kutch Basin and D) Panandhro mine section, Kutch Basin.

A. GIRAL LIGNITE MINE SECTION

B. SURKHA LIGNITE MINE SECTION

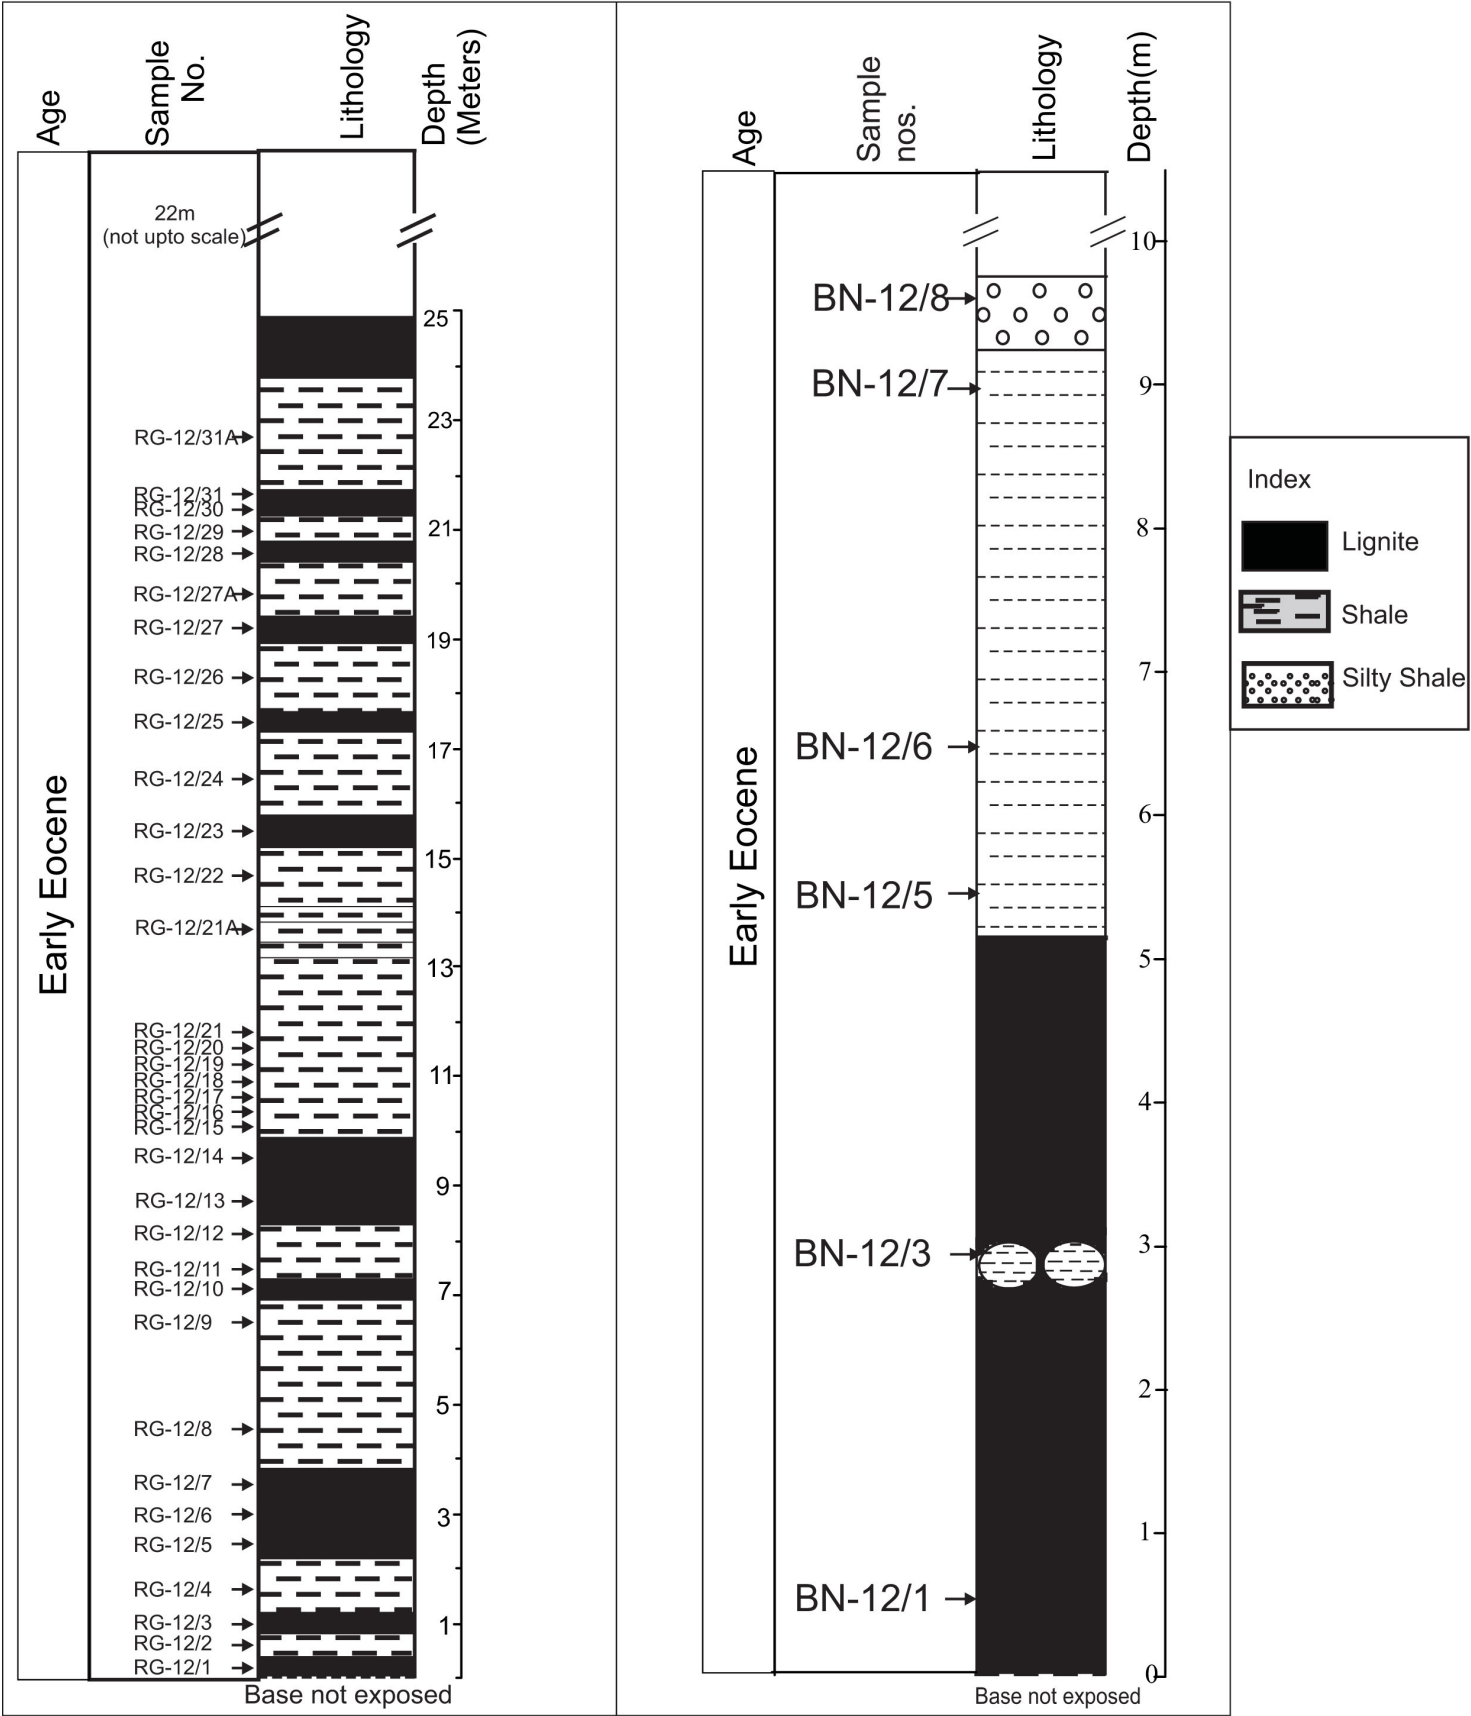

# C. MATANOMADH LIGNITE MINE SECTION

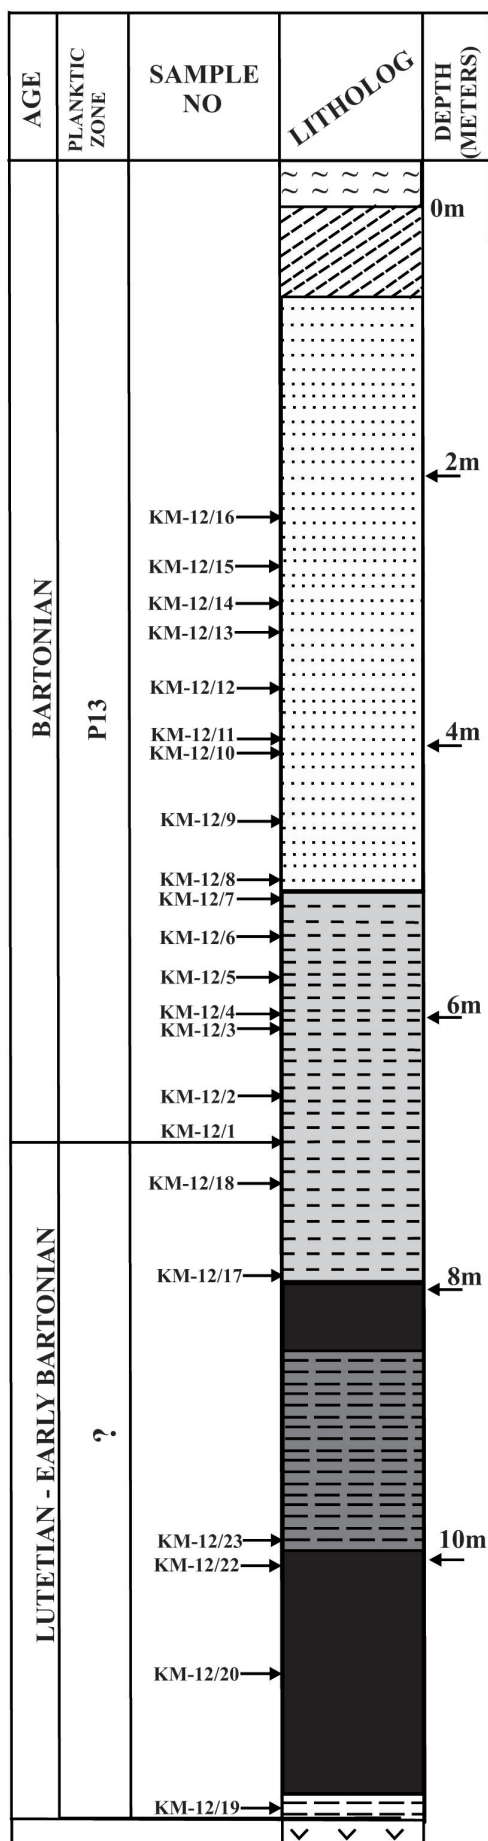

# D. PANANDHRO LIGNITE MINE SECTION

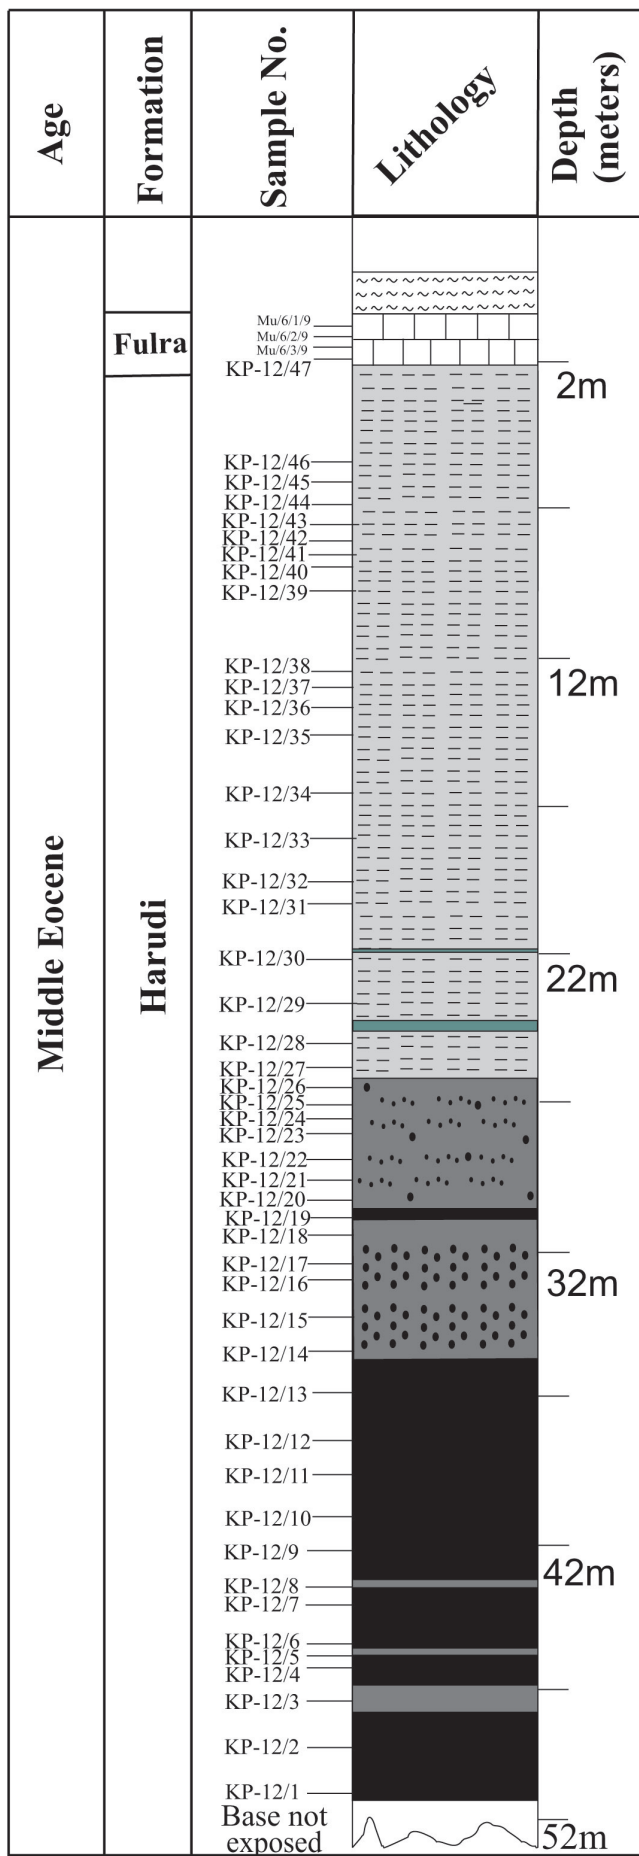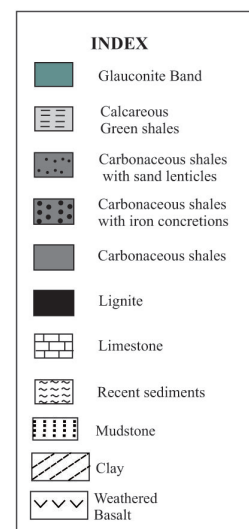

Supplement: Supplementary file 1 [file jm-38-1-2019-supplement.zip]
