# Supplementary material for: Record of Early to Middle Eocene paleoenvironmental changes from lignite mines, western India
Source: Copernicus journal article supplement (doi:10.5194/jm-38-1-2019), 2019-01-18
Supplement: Supplementary file 1 [file Supplement S2.xlsx]

## Sheet: Giral mine
		Distribution of palynormorph taxa within the Giral mine sections
		% VARIATION OF PALYNOMORPHS IN EACH SAMPLE
		Palynomorphs/ Sample numbers	RG/32	RG/29	RG/27A	RG/26	RG/24	RG/21	RG/19	RG/17	RG/16	RG/15	RG/13	RG/12	RG/11	RG/1
	M	Spinizonocolpites echinatus	27.8	17.5	23.4	35.5	29.7	22.4	64.9	26.3	14	22.1	24.4	33.3	30.6	19
	M	Spinizonocolpites brevispinosus	0	12.2	0	0	0	0	0	0	13.2	0	1.2	0	0	0
	M	Spinizonocolpites baculatus	0	0	0	0	0	7	0	0	0	6	2	0	0	12
	M	Spinizonocolpites prominatus	0	0	0	0	6.9	0	0	0	0	17.6	0	0	0	0
	M	Spinizonocolpites bulbospinosus	0	6.3	22.3	0	9.9	1.2	0	0	13.2	0	1.5	0	0	19
	M	Proxapertites cursus	0	4.2	0	0	0	6.7	0	0	0	8.1	3	0	0	0
	M	Proxapertites microreticulatus	12.7	7.4	8.5	0	11.9	5.1	12.4	7	29.8	8.8	29.5	17.8	18.5	1.9
	M	Proxapertites crassimurus	0	3.7	18.1	0	0	5.1	7.2	9.6	17.5	10.3	2.4	4.4	2.4	11.4
	M	Proxapertites sp.	0	0	3.7	0	0	0	0	0	0	0	0	0	0	0
	M	Acanthotricolpites kutchensis	0	0	0	0	0	0	0	0	0	0	0	0	0	0
	M	Acanthotricolpites bulbospinosus	11.4	12.7	0	40.1	24.8	12.2	8.2	10.5	0	16.2	23.2	25.9	4.8	0
	M	Acanthotricolpites robustus	0	0	14.9	16.6	0	0	0	0	0	4.4	0	0	0	0
	M	Acanthotricolpites brevispinosus	0	32.8	6.4	7.8	2	19.3	0	0	6.1	0	3.6	14.8	11.3	4.4
	M	Kapurdipollenites gemmatus	0	3.2	0	0	0	1.6	0	4.4	2.6	0	1.2	3.7	5.6	0
	M	Spinomonosulcites echinatus	21.5	0	0	0	0	3.5	0	0	0	0	0	0	0	0
	M	Spinomonosulcites brevispinosus	0	0	0	0	0	0	0	0	0	0	0	0	0	0
	A	Arengapollenites achinatus	5.1	0	0	0	0	0	0	0	0	0	1.8	0	0	4.4
	A	Longapertites sp.	7.6	0	0	0	0	0	0	0	0	6.6	0.6	0	0	4.4
	A	Longapertites retipilatus	0	0	0	0	0	3.1	0	0	0	0	0	0	3.2	5.7
	A	Retitrescolpites sp.	2.5	0	0	0	0	0	0	0	0	0	0	0	0	0
	A	Perfotricolpites rajpardiensis	2.5	0	0	0	0	0	0	0	0	0	0	0	0	0
	A	Palmaepollenites plicatus	0	0	0	0	0	0	0	0	0	0	0	0	0	3.8
	A	Striatriletes	0	0	0	0	0	0	0	0	0	0	0	0	0	1.9
	A	unidentified pollen	3.8	0	0	0	0	1.2	0	0	0	0	1.8	0	1.6	7
	A	Pilatricolpites sp.	0	0	0	0	2	0	0	0	0	0	0	0	0	0
	F	Foraminiferal lining	0	0	0	0	2	1.2	0	1.8	0	0	0.6	0	3.2	0
	F	Fungal body	0	0	0	0	5	2.4	0	7	1.8	0	1.5	0	4.8	0
	P	Lygodiumsporites	0	0	0	0	0	0	0	0	0	1.5	0	0	0	6.3
	P	Todisporites major	0	0	1.1	0	0	0	0	3.5	0	0	0	0	0	4.4
	P	Dictyophyllides laevigatus	0	0	0	0	0	2	2.1	0	0	0	0	0	0	0
	P	Dandotiaspora sp.	0	0	0	0	0	0	1	0	0	0	0	0	0	1.9
	P	Laevigatosporites sp.	0	0	0	0	0	0	0	4.4	0	1.5	0	0	0	0
	P	Cyathidites	5.1	0	0	0	0	0	4.1	0	0	0	1.8	0	2.4	4.4
	P	Polypodiisporites repandus	0	0	0	0	0	0	0	0	0	2.2	0	0	0	0
	P	unidentifiec spore	0	0	0	0	0	0	0	0	0	0	2.1	0	0	0
	D	Polysphaeridium sp.	0	0	0	0	0	0	0	0	0	0	0	0	0	0
	D	Cordosphaeridium exilimurum	0	0	0	0	0	0	0	0	0	0.7	0	0	0	0
	D	Apectodinium homomorphum	0	0	0	0	3	1.2	0	0	1.8	0	0	0	10.5	0
	D	Adnatosphaeridium sp.	0	0	1.6	0	0	0	0	0	0	0	0	0	0	0
	D	Apectodinium sp.	0	0	0	0	0	0	0	14.9	0	0	0	0	0	0
	D	Kenleyia complex	0	0	0	0	0	3.5	0	0	0	0	0	0	0	0
	D	Spiniferites sp.	0	0	0	0	0	1.2	0	2.6	0	0	0	0	0	0
	D	Glaphyrocysta exuberans	0	0	0	0	0	0.8	0	0	0	0	0	0	0	0
	D	Thallsiphora pelagica	0	0	0	0	0	1.6	0	7.9	0	0	0	0	0	0
	D	Unidentified dinoflagellate	0	0	0	0	3	4.7	0	0	0	0	0	0	0.8	0
	T	Mangrove elements	73.4	100	97.3	100	85.1	77.2	92.8	57.9	96.5	87.5	89.9	100	73.4	55.7
	T	Tropical rain forest elements	21.5	0	0	0	2	4.3	0	0	0	6.6	4.2	0	4.8	27.2
	T	Fungal remains	0	0	0	0	6.9	3.5	0	8.8	1.8	0	2.1	0	8.1	0
	T	Pteridophytes	5.1	0	1.1	0	0	2	7.2	7.9	0	5.1	3.9	0	2.4	17.1
	T	Dinocysts	0	0	1.6	0	5.9	13	0	25.4	1.8	0.7	0	0	11.3	0
	M;A;F;P;D	Total Count	79	189	188	217	101	254	97	114	114	136	336	135	124	158
	D	Marine Palynomorphs	0	0	3	0	6	33	0	29	2	1	0	0	14	0
	M;A;F;P	Terrestrial Palynomorphs	79	189	185	217	95	221	97	85	112	135	336	135	110	158
		M : MANGROVES
		A: TROPICAL RAIN FOREST ELEMENTS
		F: FUNGAL ELEMENTS
		P: PTERIDOPHYTES
		D: DINOFLAGELLATES
		T: TOTAL

## Sheet: Surkha Mine
		Distribution of palynormorph taxa within the Surkha mine sections
		% VARIATION OF PALYNOMORPHS IN EACH SAMPLE
		Palynomorphs/ Sample numbers	BN/12/8	BN/12/7	BN/12/6	BN/12/5	BN/12/4	BN/12/3	BN/12/2	BN/12/1
	M	Spinizonocolpites echinatus	20	18.3	13.6	3.2	0	0	0	0
	M	Spinizonocolpites indicus	0	1.6	0	0	0	0	0	0
	M	Spinizonocolpites baculatus	0	0.8	5.8	3.2	0	0	0	0
	M	Spinizonocolpitesbulbospinosus	0	3.3	18.5	8.8	0	0	0	0
	M	Spinomonosulcites echinatus	40	30.5	8.6	8.3	0	0	0	0
	M	Spinomonosulcites brevispinosus	0	5.3	0	0	0	0	0	0
	M	Proxapertites microreticulatus	20	2.8	8.2	6	0	5.4	0	0
	A	Arengapollenites achinatus	0	0.8	2.5	0	0	15.9	0	0
	A	Acanthotricolpites kutchensis	0	21.5	25.9	15.3	0	0	0	0
	A	Acanthotricolpites bulbospinosus	0	7.7	0	1.9	0	0	0	0
	A	Kapurdipollenites gemmatus	0	0	0.4	0	0	0	0	0
	A	Longapertites retpilatus	0	0	0.4	0	0	2.9	0	0
	A	Retistephanocolpites flavatus	0	0	0	0	0	0	0	0.5
	A	Retistephanocolpites granulatus	0	0	0	0	0	0.4	0	1.4
	A	Retistephanocolpites kutchensis	0	0	0	0	0	0.4	0	0.5
	A	Palmaepollenites ovatus	0	0	0	0	0	2.2	0	0
	A	Palmaepollenites nadhamunii	0	0	0	0	0	2.9	0	0
	A	Palmaepollenites kutchensis	0	0	0	0	0	2.5	0	0
	A	Retimonocolpites sp.	0	0	0	0	0	0	0	91.4
	A	Retimonocolpites thanikaimonii	0	1.2	1.2	0	0	20.3	0	0
	A	Lakiapollis Ovatus	0	0	0	1.4	0	0.4	0	1
	A	Retidiporocolpites excellensus	0	0	0	0	0	0	0	0.5
	A	Tetrad Sp.	0	0	0	0	0	0	0	1
	A	Tribrevicolporites eocenicus	0	0	1.6	0	0	1.1	0	0.5
	A	Graminidites	0	0	0	0	0	8	0	0
	A	unidentified pollen	0	1.6	1.2	0.9	0	6.2	0	3.3
	F	Kutchiathyrites sp.	20	0	2.5	0	0	0	0	0
	F	Inapertisporites kedvesii	0	0	0.4	0	0	0	0	0
	F	Phragmothyrites eocenica?	0	0	1.6	0	0	0	0	0
	F	Brachysporisporites sp. ?	0	0	0.4	0	0	0	0	0
	F	Hyphae	0	0	0.4	0	0	0	0	0
	P	Lycopodiumsporites	0	0.4	1.2	1.4	0	0	0	0
	P	Todisporites minor	0	0	0.4	0.5	0	1.4	0	0
	P	Todisporites major	0	0	0.4	0	0	0	0	0
	P	Polypodiisporites repandus	0	0	0	3.2	0	0	0	0
	P	Dandotiaspora sp.	0	0	0	0	0	0.4	0	0
	P	Laevigatosporites cognatus	0	0	0	0	0	22.8	0	0
	P	Intrapunctisporis apunctis	0	0	0	0	0	0	0	0
	P	Cheilanthoidspora enigmata	0	0.8	0	0	0	0	0	0
	P	Biretisporites convexus	0	0	0	0	0	3.3	0	0
	P	unidentified spore	0	0	1.2	0	0	3.6	0	0
	D	Achomosphaera sp.	0	0.4	0	0	0	0	0	0
	D	Cordosphaeridium fibrospinosum	0	1.6	0	0.5	0	0	0	0
	D	Homotryblium sp.	0	0	0	0.9	0	0	0	0
	D	Homotryblium pallidum	0	0	0	0.5	0	0	0	0
	D	Homotryblium tenuispinosum	0	0	0	0.9	0	0	0	0
	D	Muratodinium fimbriatum	0	0	0	0.5	0	0	0	0
	D	Oligosphaeridium sp.	0	0	0	0.5	0	0	0	0
	D	Adnatosphaeridium sp.	0	0	0	0	0	0	0	0
	D	Unidentified dinoflagellate	0	1.2	3.3	42.1	0	0	0	0
	T	Angiosperms	80	95.5	88.1	49.1		68.5		100
	T	Fungal Remains	20	0	5.3	0		0		0
	T	Pteridophytes	0	1.2	3.3	5.1		31.5		0
	T	Dinoflagellates	0	3.3	3.3	45.8		0		0
	A;F;P;D	Total count	5	246	243	216	0	276	0	209
	D	Marine palynomorphs	0	8	8	99	0	0	0	0
	A;F;P	Terrestrial Palynomorphs	5	238	235	117	0	276	0	209
		M : MANGROVES
		A: TROPICAL RAIN FOREST ELEMENTS
		F: FUNGAL ELEMENTS
		P: PTERIDOPHYTES
		D: DINOFLAGELLATES
		T: TOTAL

## Sheet: Panandhro Mine
		Distribution of palynormorph taxa within the Panandhro mine sections
		% VARIATION OF PALYNOMORPHS IN EACH SAMPLE
		Palynomorphs/ Sample numbers	KP/31	KP/21	KP/15	KP/14	KP/10	KP/7	KP/5	KP/3	KP/1
	M	Spinizonocolpites echinatus	16.2	25.9	0	0	8.3	76.5	65.8	0	0
	M	Spinizonocolpites prominatus	0	1.2	0	0	0	0	0	0	0
	M	Spinizonocolpitesbulbospinosus	5.2	1.2	0	0	0	0	0	0	0
	M	Proxapertites cursus	1.2	7.4	0	0	4.2	0	0	0	0
	M	Acanthotricolpites kutchensis	0	0	0	0	0	0	27.5	0	0
	M	Spinomonosulcites echinatus	0	6.8	0	0	0	0	0	0	0
	A	Arengapollenites achinatus	0	3.7	0	0	0	0	0	0	0
	A	Longapertites retpilatus	0	6.8	0	0	0	0	0	0	0
	A	Palmaepollenites ovatus	0	4.3	0	0	0	0	0	0	0
	A	Lakiapollis Ovatus	0	8	0	0	0	0	0	0	0
	A	Tribrevicolporites sp.	0	0	0	0	5.6	0	0	0	0
	A	Graminidites	0	0	0	0	0	0	0	0	0
	A	unidentified pollen	0	6.8	13.6	0	6.9	0	0	0	0
	A	Albertipollenites crassireticulatus	0	4.9	27.3	0	9.7	0	0	0	0
	A	Trilatiporites minutus	0	0	0	3.8	0	11.8	0	0	0
	A	Meliapollis ramanujam	0	0	0	0	22.9	11.8	0	0	0
	A	Meliapollisnavalei	0	0	0	0	2.8	0	0	0	0
	A	Incrotonipollis neyvelii	0	0	0	0	11.1	0	0	0	0
	A	Spinulotetradites juxlatus	0	0	0	0	4.2	0	0	0	0
	A	Ctenolophonidites costatus	0	0.6	0	0	2.1	0	0	0	0
	A	Dipterocarpuspollenites retipilatus	0	4.3	0	0	12.5	0	0	0	0
	A	Paleoaraliiaceaepites distinctus	0	0	0	0	9.7	0	0	0	0
	A	Iugopollis tetraporites	0	0.6	0	0	0	0	0	0	0
	A	Margocolporites venkatachalae	0	1.2	0	0	0	0	0	0	0
	A	Tricolpites sp.	0	3.1	0	0	0	0	0	0	0
	A	Tribrevicolporate eocenicus	0	1.9	0	0	0	0	0	0	0
	A	Albertipollenites kutchensis	0	0.6	0	0	0	0	0	0	0
	A	Prectenolophonidites distinctus	0	0.6	0	0	0	0	0	0	0
	A	Retipollenites echinulatus	0	0.6	0	0	0	0	0	0	0
	F	Kutchiathyrites sp.	0	0	59.1	72.2	0	0	6.7	0	0
	F	Inapertisporites kedvesii	0	0	0	0	0	0	0	0	0
	F	Phragmothyrites eocenica?	0	0	0	24.1	0	0	0	0	0
	P	Dandotiaspora sp.	0	1.9	0	0	0	0	0	0	0
	P	Laevigatosporites lakiensis	0	3.7	0	0	0	0	0	0	0
	D	Homotryblium floripes	3.5	0.6	0	0	0	0	0	0	0
	D	Thallasiphora patula	18.5	0	0	0	0	0	0	0	0
	D	Kenleyia complex	25.1	0	0	0	0	0	0	0	0
	D	Spiniferites ramosus	6.1	0	0	0	0	0	0	0	0
	D	Glaphyrocysta exuberans	3.2	0	0	0	0	0	0	0	0
	D	Operculodinium sp.	3.5	0.6	0	0	0	0	0	0	0
	D	Thallsiphora pelagica	1.4	0	0	0	0	0	0	0	0
	D	Thallsiphora fenestrata	9.8	0	0	0	0	0	0	0	0
	D	Polysphaeridium subtile	3.5	2.5	0	0	0	0	0	100	0
	D	unidentified dinoflagellate	2.9	0	0	0	0	0	0	0	0
	T	Mangrove elements	22.5	42.6	0	0	12.5	76.5	93.3	0	0
	T	Tropical rain forest elements	0	48.1	40.9	3.8	87.5	23.5	0	0	0
	T	Fungal remains	0	0	59.1	96.2	0	0	6.7	0	0
	T	Pteridophytes	0	5.6	0	0	0	0	0	0	0
	T	Dinocysts	77.5	3.7	0	0	0	0	0	100	0
	M;A;F;P;D	Total Count	346	162	22	133	144	17	120	2	0
	D	MARINE PALYNOMORPHS	268	6	0	0	0	0	0	2	0
	M;A;F;P	Terrestrial palynomorphs	78	156	22	133	144	17	120	0	0
		M : MANGROVES
		A: TROPICAL RAIN FOREST ELEMENTS
		F: FUNGAL ELEMENTS
		P: PTERIDOPHYTES
		D: DINOFLAGELLATES
		T: TOTAL

## Sheet: Matanomadh Mine
		Distribution of palynormorph taxa within the Matanomadh mine sections
		% VARIATION OF PALYNOMORPHS IN EACH SAMPLE
		Palynomorphs/ Sample numbers	KM16/18	KM15/17	KM14/16	KM13/15	KM12/14	KM11/13	KM10/12	KM9/11	KM8/10	KM7/9	KM6/8	KM5/7	KM4/6	KM3/5	KM2/4	KM1/3	KM23/2	KM19/1
	M	Spinizonocolpites echinatus	5.4	28.7	0	7.2	0	0	0	0	0	0	0	0	0	0	0	0	4.2	0
	M	Spinizonocolpitesbulbospinosus	0	0	0	0	0	0	0	0	0	0	0	0	0	0	0	0	3.5	0
	M	Proxapertites cursus	0	0	0	0	0	0	0	0	0	0	0	0	0	0	0	0	2.2	0
	M	Acanthotricolpites kutchensis	0	0	0	0	0	0	0	0	0	0	0	0	0	0	0	0	2.4	0
	A	unidentified pollen	0	0	0	0	0	0	0	0	0	0	0	0	0	0	0	0	1.1	0
	A	Albertipollenites crassireticulatus	4.5	12.8	0	0	0	0	0	0	0	4	0	0	0	0	0	0	1.5	0
	F	Kutchiathyrites sp.	0	0	0	0	0	0	0	0	0	0	0	0	18.3	0	2.4	0	0	0
	F	Inapertisporites kedvesii	0	0	0	0	0	0	0	0	100	0	0	0	0	0	0	0	0	0
	F	Phragmothyrites eocenica?	0	0	0	0	0	0	0	0	0	0	0	0	0	3.7	0	0	0	0
	F	fungal body	0	0	0	0	0	0	0	0	0	0	0	0	0	0	0	0	1.5	0
	P	Lycopodiumsporites	0	0	0	0	0	0	0	0	0	4	0	0	0	0	0	0	0	0
	P	Schizaeoisporites sp.	0	0	0	0	0	0	0	0	0	0	0	0	0	0	0	0	1.5	0
	P	Laevigatosporites lakiensis	0	0	0	0	0	0	0	0	0	0	0	0	0	0	0	0	0.7	0
	D	Polysphaeridium sp.	2.7	0	0	0	0	0	0	0	0	0	0	3.1	0	0	0.8	0	0	0
	D	Cordosphaeridium exilimurum	0	7.4	0	3.6	0	0	0	0	0	0	0	0	0	0	6.1	37.5	0	0
	D	Homotryblium floripes	0	0	3.3	3.6	0	0	0	0	0	0	0	0	0	3	4.5	0	0	0
	D	Homotryblium sp.	0	0	0	5.4	0	0	0	0	0	0	0	0	0	0	0	25	0.9	0
	D	Eocladopyxis peniculata	0	0	0	0	0	0	0	0	0	0	0	0	0	0	0	0	1.7	0
	D	Operculodinium divergense	0	0	0	0	0	0	0	0	0	0	0	0	0	0	0.8	0	0	0
	D	Areoligera sp.	0	0	0	0	0	0	0	0	0	0	0	0	0	0	1.2	0	0	0
	D	Achomosphaera sp.	0	0	3.3	0	0	0	0	0	0	0	0	1.5	0	6	3.7	0	0	0
	D	Thallasiphora patula	0	0	0	0	0	0	0	0	0	0	0	0	0	0	0	0	0	0
	D	Kenleyia complex	0	0	0	0	0	0	0	0	0	0	0	0	0	5.2	2	0	1.3	0
	D	Spiniferites ramosus	26.8	0	31.7	26.1	0	0	0	0	0	26	0	0	21.7	27.6	26	0	1.8	0
	D	Glaphyrocysta exuberans	9.8	40.4	0	7.2	0	0	0	0	0	40	0	0	0	24.6	7.7	0	3.5	0
	D	Operculodinium centrocarpum	0	0	20	16.2	0	0	0	0	0	16	0	2.3	0	3	18.3	12.5	0	0
	D	Thallsiphora pelagica	0	0	0	0	0	0	0	0	0	0	0	0	0	3	0	0	20.9	0
	D	Glaphyrocysta sp.	0	0	18.3	11.7	0	0	0	0	0	0	0	8.5	11.7	0	4.9	25	2	0
	D	Polysphaeridium subtile	28.6	3.2	13.3	6.3	0	0	0	0	0	2	0	0	11.7	9.7	14.2	0	46.1	0
	D	unidentified dinoflagellate	9.8	7.4	10	5.4	0	0	0	0	0	4	0	0	0	3	7.3	0	3.3	0
	D	Hystricholpoma unisinosum	0	0	0	0	0	0	0	0	0	0	0	0	0	5.2	0	0	0	0
	D	Imapgidinium sp.	0	0	0	0	0	0	0	0	0	0	0	0	0	1.5	0	0	0	0
	D	Cordosphaeridium cantharellus	0	0	0	0	0	0	0	0	0	0	0	0	0	4.5	0	0	0	0
	D	Wilsonidium sp.	1.8	0	0	3.6	0	0	0	0	0	0	0	0	0	0	0	0	0	0
	D	Wilsonidium tabulatum	0	0	0	3.6	0	0	0	0	0	0	0	0	0	0	0	0	0	0
	D	Hystricholpoma rigudae?	0	0	0	0	0	0	0	0	0	0	0	3.1	0	0	0	0	0	0
	FO	Foraminiferal lining	10.7	0	0	0	0	0	0	0	0	4	0	81.5	36.7	0	0	0	0	0
	T	mangrove elements	5.4	28.7	0	7.2	0	0	0	0	0	0	0	0	0	0	0	0	12.3	0
	T	Tropical rainforest elements	4.5	12.8	0	0	0	0	0	0	0	4	0	0	0	0	0	0	2.6	0
	T	Fungal remains	0	0	0	0	0	0	0	0	100	0	0	0	18.3	3.7	2.4	0	1.5	0
	T	Pteridophytes	0	0	0	0	0	0	0	0	0	4	0	0	0	0	0	0	2.2	0
	T	Dinocysts	79.5	58.5	100	92.8	0	0	0	0	0	88	0	18.5	45	96.3	97.6	100	81.5	0
	T	Foraminiferal lining	10.7	0	0	0	0	0	0	0	0	4	0	81.5	36.7	0	0	0	0	0
	M;A;F;P;D;FO	Total count	112	94	60	111	0	0	0	0	2	50	0	130	60	134	246	16	545	0
	D;FO	Marine palynomorphs	101	55	60	103	0	0	0	0	0	46	0	130	49	129	240	16	444	0
	M;A;F;P	terrestrial palynomorphs	11	39	0	8	0	0	0	0	2	4	0	0	11	5	6	0	101	0
		M : MANGROVES
		A: TROPICAL RAIN FOREST ELEMENTS
		F: FUNGAL ELEMENTS
		P: PTERIDOPHYTES
		D: DINOFLAGELLATES
		T: TOTAL
