# Supplementary material for: Record of Early to Middle Eocene paleoenvironmental changes from lignite mines, western India
Source: Copernicus journal article supplement (doi:10.5194/jm-38-1-2019), 2019-01-18
Supplement: Supplementary file 2 [file jm-38-1-2019-supplement.zip]

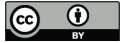

## *Supplement of*

# **Record of Early to Middle Eocene paleoenvironmental changes from lignite mines, western India**

**Sonal Khanolkar and Jyoti Sharma**

*Correspondence to:* Sonal Khanolkar (sonal.k.12@gmail.com)

- jm-38-1-2019-supplement-title-page.pdf
- Supplement S1.pdf
- Supplement S2.xlsx
- Supplement S3.pdf

The copyright of individual parts of the supplement might differ from the CC BY 4.0 License.
