# Supplementary material for: Record of Early to Middle Eocene paleoenvironmental changes from lignite mines, western India
Source: Copernicus journal article supplement (doi:10.5194/jm-38-1-2019), 2019-01-18
Supplement: Supplementary file 3 [file jm-38-1-2019-supplement.zip]

Table 1

| Botanical group/<br>family | Palynotaxa                                                                                                                                                                  | Extant genera     | Present day<br>distribution                                             |
|----------------------------|-----------------------------------------------------------------------------------------------------------------------------------------------------------------------------|-------------------|-------------------------------------------------------------------------|
| <b>Thallophyta</b>         |                                                                                                                                                                             |                   |                                                                         |
| Fungi                      | <i>Inapertisporites kedvesii</i> ; Elsik 1968<br><i>Kutchiathyrites eccentricus</i> ; Kar 1979<br><i>Phragmothyrites eocaenicus</i> ; Edwards emend. Kar<br>and Saxena 1976 |                   | Warm, humid<br>and tropical<br>climate                                  |
| <b>Pteridophyta</b>        |                                                                                                                                                                             |                   |                                                                         |
| Cyatheaceae                | <i>Cyathidites australis</i><br><i>Cyathidites minor</i>                                                                                                                    | <i>Cyathea</i>    | Tropical to<br>subtropical;<br>tree fern of<br>thick tropical<br>forest |
| Matoniaceae                | <i>Biretisporites convexusus</i><br><i>Dandotiaspora telonata</i><br><i>Dandotiaspora dilata</i><br><i>Dandotiaspora</i> sp.                                                |                   | Tropical to<br>subtropical;<br>tree fern of<br>thick tropical<br>forest |
| Lycopodiaceae              | <i>Lycopodiumsporites eocenicus</i><br><i>Lycopodiumsporites lakiensis</i><br><i>Lycopodiumsporites sahi</i>                                                                | <i>Lycopodium</i> | Tropical,<br>species are<br>dominantly<br>epiphytes in<br>thick forest  |
| Polypodiaceae              | <i>Laevigatosporites cognatus</i><br><i>Polypodiisporites repandus</i><br><i>Monolites</i> sp.                                                                              |                   | Cosmopolitan                                                            |
| Osmundaceae                | <i>Todisporites major</i><br><i>Todisporites minor</i>                                                                                                                      |                   | Cosmopolitan,<br>terrestrial to<br>subaquatic<br>ferns                  |
| Hymenophyllaceae           | <i>Biretisporites convexus</i>                                                                                                                                              |                   |                                                                         |
| Dictyophyllaceae           | <i>Dictyophyllides laevigatus</i>                                                                                                                                           |                   | cosmopolitan                                                            |
| Schizaeaceae               | <i>Lygodiumsporites eocenicus</i><br><i>Lygodiumsporites lakiensis</i>                                                                                                      | <i>Lygodium</i>   | Tropical-sub<br>tropical;<br>climbing fern                              |

|                  |                                                                                                                                                                                                                                                                                                                                                                                                                                                                                                                                                                                                                                                                                                                                   |                          |                                               |
|------------------|-----------------------------------------------------------------------------------------------------------------------------------------------------------------------------------------------------------------------------------------------------------------------------------------------------------------------------------------------------------------------------------------------------------------------------------------------------------------------------------------------------------------------------------------------------------------------------------------------------------------------------------------------------------------------------------------------------------------------------------|--------------------------|-----------------------------------------------|
| Angiospermae     |                                                                                                                                                                                                                                                                                                                                                                                                                                                                                                                                                                                                                                                                                                                                   |                          |                                               |
| Monocotyledonae  | <i>Acanthotricolpites bulbospinosus</i><br><i>Acanthotricolpites kutchensis</i><br><i>Acanthotricolpites brevispinosus</i>                                                                                                                                                                                                                                                                                                                                                                                                                                                                                                                                                                                                        | <i>Nypa</i> -like pollen | Tropical to subtropical; back mangrove        |
| Areaceae         | <i>Acanthotricolpites bulbospinosus</i><br><i>Acanthotricolpites robustus</i><br><i>Acanthotricolpites tiruchirapalliensis</i><br><br><i>Kapurdipollenites gemmatus</i><br><i>Kapurdipollenites clavatus</i><br><br><i>Spinizonocolpites adamanteus</i><br><i>Spinizonocolpites baculatus</i><br><i>Spinizonocolpites echinatus</i><br><i>Spinizonocolpites bulbospinosus</i><br><i>Spinizonocolpites kutchensis</i><br><i>Spinizonocolpites prominatus</i><br><i>Spinizonocolpites</i> sp.<br><br><i>Spinomonosulcites achinatus</i><br><i>Spinomonosulcites brevispinosus</i><br><br><i>Proxapertites cursus</i><br><i>Proxapertites crassimurus</i><br><i>Proxapertites emandatus</i><br><i>Proxapertites microreticulatus</i> |                          |                                               |
|                  | <i>Longapertites retipilatus</i>                                                                                                                                                                                                                                                                                                                                                                                                                                                                                                                                                                                                                                                                                                  | <i>Pinanga</i>           | mostly tropical                               |
|                  | <i>Arengapollenites achinatus</i>                                                                                                                                                                                                                                                                                                                                                                                                                                                                                                                                                                                                                                                                                                 | <i>Arenga</i>            | lowland evergreen palms                       |
|                  | <i>Palmaepollenites kutchensis</i><br><i>Palmaepollenites nadhamunii</i><br><i>Palmaepollenites ovatus</i>                                                                                                                                                                                                                                                                                                                                                                                                                                                                                                                                                                                                                        | <i>Lepidorrhachis</i>    | Dense evergreen forest of medium altitude     |
|                  | <i>Retipollenites confusus</i><br><i>Retipollenites borassodendrii</i><br><i>Retipollenites echinulatus</i>                                                                                                                                                                                                                                                                                                                                                                                                                                                                                                                                                                                                                       | <i>Borassodendron</i>    | Lowland evergreen palms                       |
|                  | <i>Lakiapollis Ovatus</i>                                                                                                                                                                                                                                                                                                                                                                                                                                                                                                                                                                                                                                                                                                         | <i>Durio</i>             | wet evergreen vegetation                      |
| Dicotyledonae    |                                                                                                                                                                                                                                                                                                                                                                                                                                                                                                                                                                                                                                                                                                                                   |                          |                                               |
| Bombacaceae      |                                                                                                                                                                                                                                                                                                                                                                                                                                                                                                                                                                                                                                                                                                                                   |                          |                                               |
|                  | <i>Dipterocarpuspollenites retipilatus</i><br><i>Albertipollenites</i> sp.<br><i>Albertipollenites crassireticulatus</i>                                                                                                                                                                                                                                                                                                                                                                                                                                                                                                                                                                                                          | <i>Dipterocarpus</i>     | Tropical-subtropical, swampy evergreen forest |
| Dipterocarpaceae |                                                                                                                                                                                                                                                                                                                                                                                                                                                                                                                                                                                                                                                                                                                                   |                          |                                               |

|                  |                                                                                                                              |                                |                                                                 |
|------------------|------------------------------------------------------------------------------------------------------------------------------|--------------------------------|-----------------------------------------------------------------|
|                  | <i>Albertipollenites kutchensis</i>                                                                                          |                                | Moist tropical forest                                           |
| Pedaliaceae      | <i>Retistephanocolpites flavatus</i><br><i>Retistephanocolpites granulatus</i><br><i>Retistephanocolpites kutchensis</i>     | <i>pedalium</i>                | Tropical-subtropical                                            |
| Unidentified     | <i>Tribrevicolporites eocenicus</i> ; Kar 1985<br><i>Foveotricolpites</i> sp.<br><i>Barringtoniapollenites retibaculatus</i> |                                |                                                                 |
| Euphorbiaceae    | <i>Incrotonipollis neyvelii</i>                                                                                              | <i>Jatropha cursus</i>         | Tropics to subtropics                                           |
| Convolvulaceae   | <i>Perfotricolpites rajpardiensis</i>                                                                                        | <i>Merremia</i>                | Warm tropics climber                                            |
| Caesalpiniaceae  | <i>Margocolporites</i> spp.                                                                                                  | <i>Caesalpinia</i>             | Tropics to subtropics<br>Mostly woody climbers in thick forests |
| Alangiaceae      | <i>Pellicieroipollis langenheimii</i>                                                                                        | <i>Alangium</i>                | Tropics to subtropics<br>Mostly woody trees                     |
| Sapotaceae       | <i>Iugopollis tetraporites</i>                                                                                               |                                | Tropics; members of evergreen vegetation                        |
| Ctenolophonaceae | <i>Ctenolophonidites costatus</i>                                                                                            | <i>Ctenolophon englerianus</i> | Tropical Africa                                                 |

---
