# Supplementary material for: Record of Early to Middle Eocene paleoenvironmental changes from lignite mines, western India
Source: Copernicus journal article supplement (doi:10.5194/jm-38-1-2019), 2019-01-18
Supplement: Supplementary file 4 [file jm-38-1-2019-supplement.zip]

Archive with 4 entries (4 files):
- Supplement S1.pdf
- jm-38-1-2019-supplement-title-page.pdf
- Supplement S3.pdf
- Supplement S2.xlsx
